# Supplementary material for: Hybrid vesicles as intracellular reactive oxygen species and nitric oxide generators
Source: Royal Society of Chemistry journal article supplement (doi:10.1039/c9nr02584g), 2019-01-01
Supplement: c9nr02584g1.pdf [file c9nr02584g1.pdf]

## Supporting Information

# Hybrid Vesicles as Intracellular Reactive Oxygen Species and Nitric Oxide Generators

Yan Zhang<sup>#†</sup>, Noga Gal<sup>#†</sup>, Fabian Ite<sup>#†</sup>, Isabella N. Westensee<sup>†</sup>, Edit Brodzkij<sup>†</sup>, Daniel Mayer<sup>‡</sup>, Steffen Stenger<sup>‡</sup>, Miquel Castellote-Borrell<sup>†</sup>, Thomas Boesen<sup>†</sup>, Seyed R Tabaei<sup>§</sup>, Fredrik Höök<sup>§</sup>, Brigitte Städler<sup>\*†</sup>

<sup>†</sup>Interdisciplinary Nanoscience Center (iNANO), Aarhus University, Gustav Wieds Vej 14, 8000 Aarhus, Denmark

<sup>‡</sup>Institute for Medical Microbiology and Infection Control, University Hospital Ulm, Ulm, Germany

<sup>§</sup>Department of Physics, Chalmers University of Technology, 41296 Gothenburg, Sweden

<sup>#</sup>These authors contributed equally

\* E-mail: bstadler@inano.au.dk

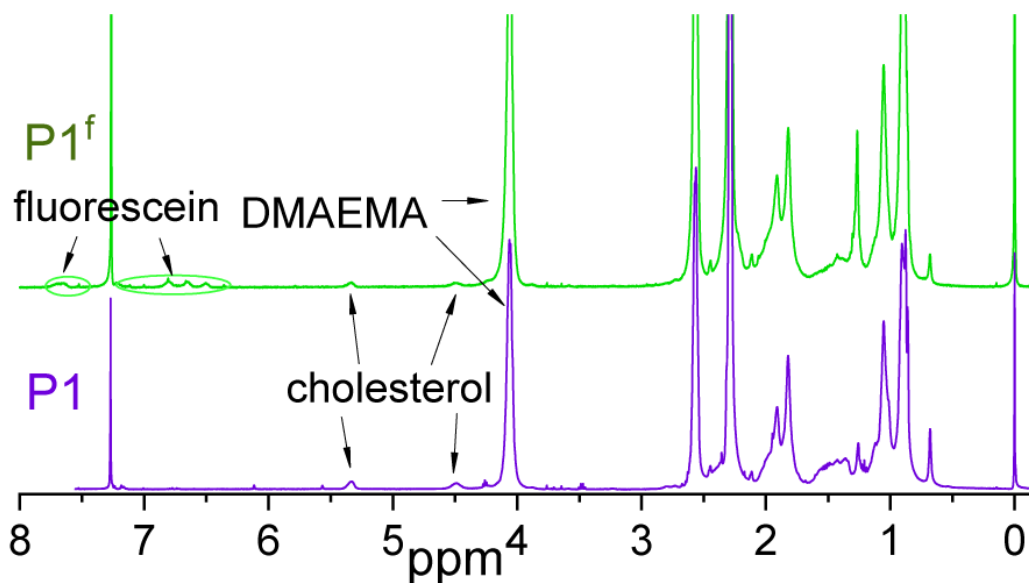

**Figure S1.** <sup>1</sup>H NMR (400 MHz) spectra of the block copolymers P1 and <sup>13</sup>C-P1 in CDCl<sub>3</sub>.

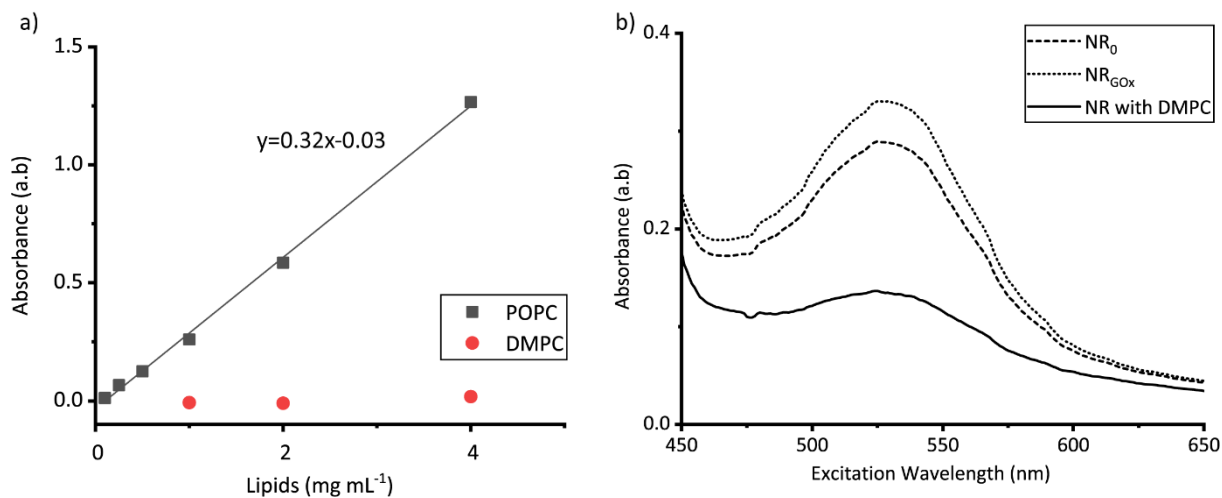

**Figure S2.** Lipid concentration determined by the sulfo-phospho-vanillin reaction. a) Typical concentration curve for (non-extruded) POPC liposomes including the linear fit used to determine unknown lipid amounts in samples, compared to (non-extruded) DMPC liposomes. b) Absorbance spectra of sulfo-phospho-vanillin reacted NR<sub>0</sub>, NR<sub>GOx</sub> and NR containing DMPC instead of POPC after size exclusion chromatography.

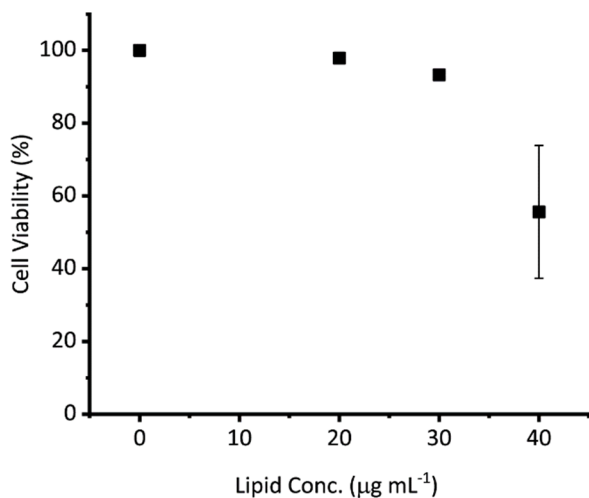

**Figure S3.** Cell viability of RAW 264.7 cells exposed to increasing amounts of NR<sub>0</sub> for 24 h.

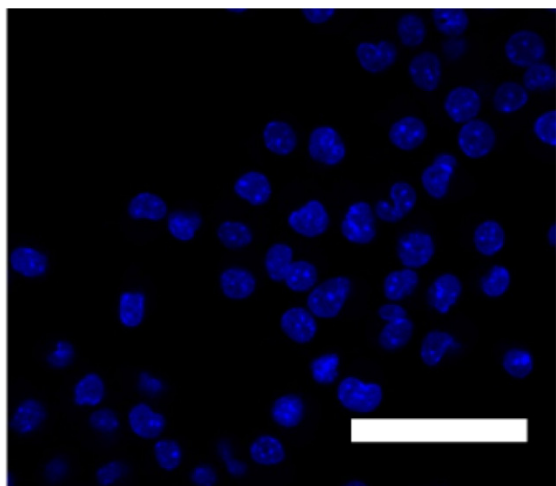

**Figure S4.** Representative CLSM image of fixed and stained RAW 264.7 cells, confirming the absence of red fluorescence when the cells were not exposed to  $^{\text{f}}\text{NR}_o$  (blue: Hoechst stained nuclei). The blue and red channels are overlaid in the same way as in Figure 1d. The scale bar is 50  $\mu\text{m}$ .

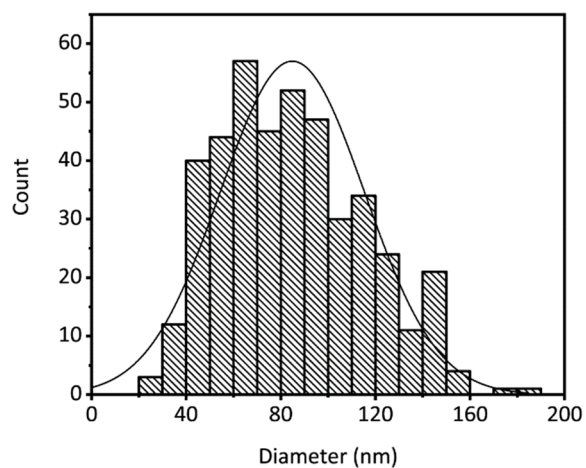

**Figure S5.** Size histogram of  $\text{NR}_{\text{GOx}}$  as determined from cryo-EM images using the ImageJ software. The histogram and mean value were calculated using Origin software.

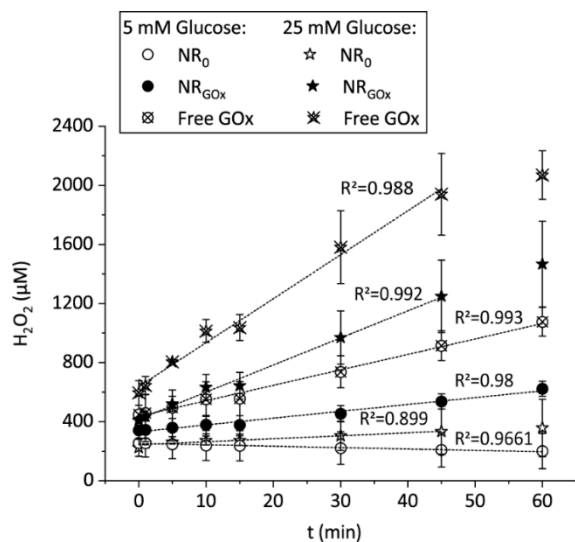

**Figure S6.** Time-dependent  $H_2O_2$  production in low- (5 mM) and high- (25 mM) glucose media for  $NR_0$ ,  $NR_{GOx}$ , and free GOx. The dashed lines represent the linear fits for each curve.

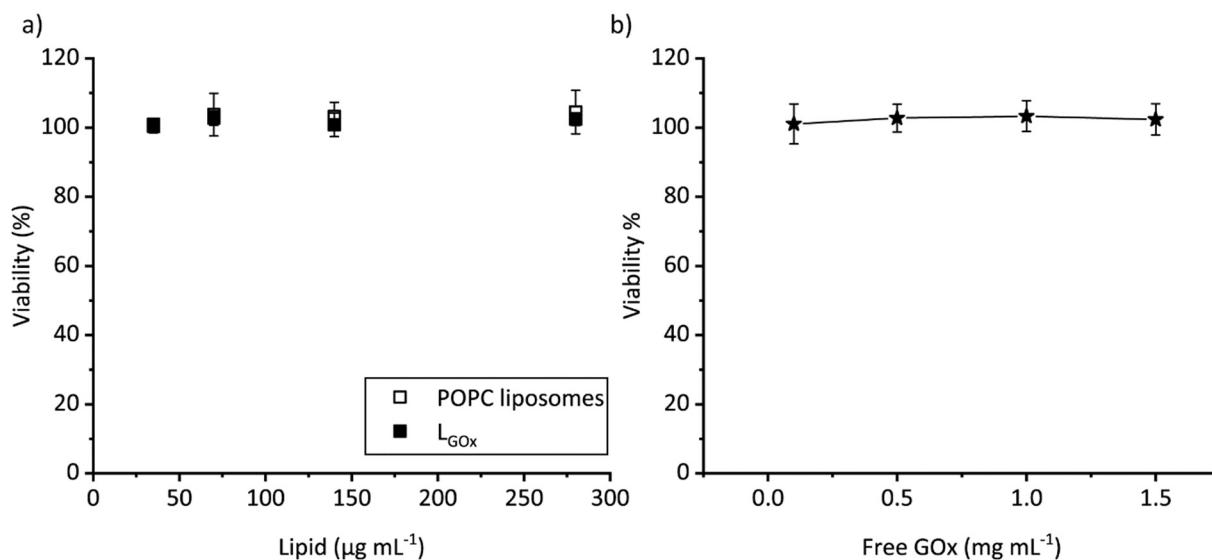

**Figure S7.** Viability of RAW 264.7 macrophages exposed to glucose-free media for 2 h to a) empty POPC liposomes and GOx-loaded POPC liposomes ( $L_{GOx}$ ) at concentrations similar to  $NR_{GOx}$ , and b) free GOx at concentrations up to 5× higher than the determined encapsulated amount of GOx in  $NR_{GOx}$ . Following on, the cells were incubated for 24 h in high-glucose media, and the viability was assessed using the CCK-8 kit. Data represent mean values  $\pm$  StD ( $n = 3$ ).

**Table S1. N<sub>o</sub>, NR<sub>GOx</sub> and NR<sub>β-Gal</sub> characterization**

| Vesicle type        | Size (nm) <sup>a)</sup> | PDI <sup>b)</sup> | LE (%) <sup>c)</sup> | Usage                                                                                                                                                                                                |
|---------------------|-------------------------|-------------------|----------------------|------------------------------------------------------------------------------------------------------------------------------------------------------------------------------------------------------|
| NR <sub>o</sub>     | 206 ± 36                | 0.20              | --                   | Dosing in RAW 264.7 macrophages                                                                                                                                                                      |
|                     | 437 ± 117               | 0.25              | --                   | Controls for NR <sub>β-Gal</sub> in RAW 264.7 macrophages and primary macrophages<br>Hybrid vesicle imaging<br>Controls for the intracellular activity of NR <sub>GOx</sub> in RAW 264.7 macrophages |
| NR <sub>GOx</sub>   | 445±66                  | 0.27              | ~35                  | All the experiments involving NR <sub>GOx</sub>                                                                                                                                                      |
| L <sub>GOx</sub>    | 225±8                   | 0.09              | NA                   | Liposome control experiments                                                                                                                                                                         |
| NR <sub>β-Gal</sub> | 240 ± 65                | 0.28              | ~6                   | All the experiments involving NR <sub>β-Gal</sub> beside imaging                                                                                                                                     |
|                     | 440 ± 97                | 0.27              | N/A                  | Hybrid vesicle imaging                                                                                                                                                                               |
| L <sub>β-Gal</sub>  | 218 ± 7                 | 0.13              | NA                   | Liposome control experiments                                                                                                                                                                         |

<sup>a)</sup>Hydrodynamic diameter assessed by DLS; <sup>b)</sup>Polydispersity index; <sup>c)</sup>Enzyme loading efficiency

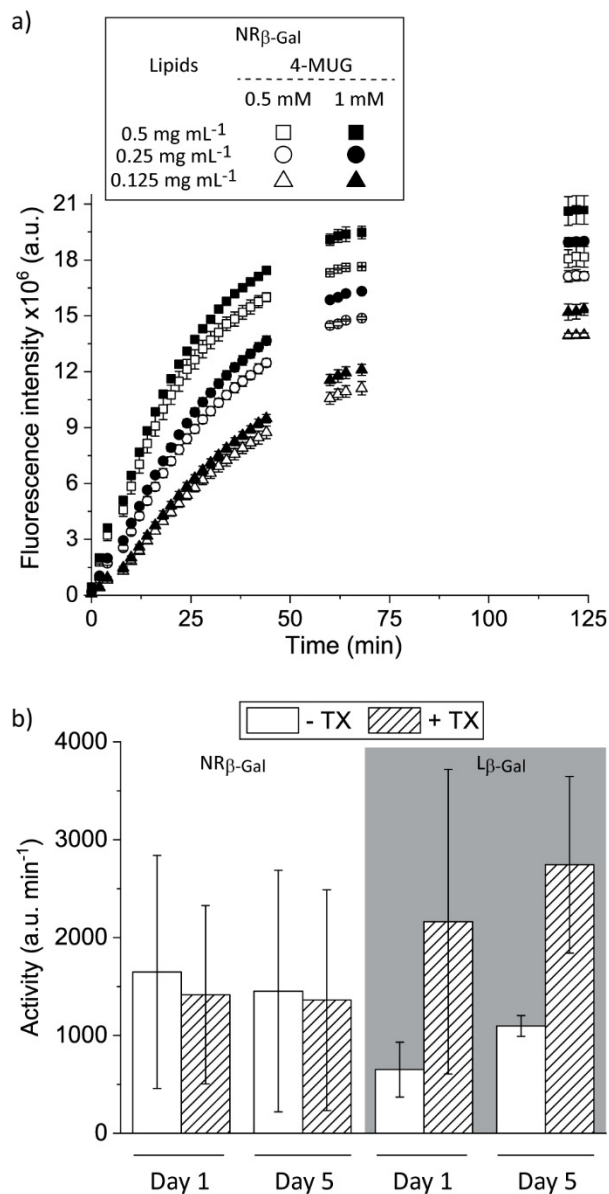

**Figure S8. NR $\beta$ -Gal activity:** a) Conversion kinetics of 0.5 mM (open symbols) and 1 mM (closed symbols) 4-MUG into fluorescent 4-MUB by NR $\beta$ -Gal within 120 min. Three different NR $\beta$ -Gal concentrations were used. Data represent mean  $\pm$  StD. ( $n = 3$ ). b) Slopes obtained from the enzymatic reaction profiles of NR $\beta$ -Gal and L $\beta$ -Gal as prepared (day 1) and after 5 days incubation at 37  $^{\circ}$ C using 0.5 mM 4-MUG in the presence or absence of Triton X (TX 0.1 wt%). L $\beta$ -Gal represents  $\beta$ -Gal loaded POPC liposomes.

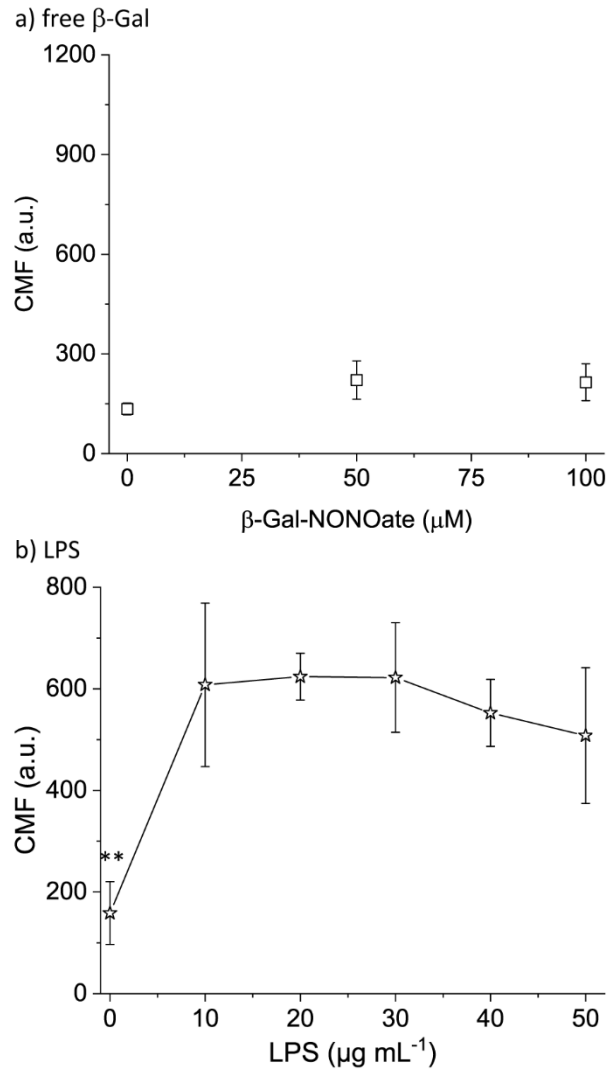

**Figure S9.** a) CMF of RAW 264.7 cells exposed to  $\beta$ -Gal in solution followed by incubation with different concentrations of  $\beta$ -Gal-NONOate. b) CMF of RAW 264.7 cells stimulated with increasing amounts of LPS for 19 h. In a) and b), the intracellular NO was determined using DAF-FM and flow cytometry as the read-out method. (n = 3, \*\*p < 0.01)
